# Supplementary material
Source: PubMed Central journal article supplement (PMC9446612)
Supplement: 228_2022_3380_MOESM1_ESM.pdf [file 228_2022_3380_MOESM1_ESM.pdf]

## Supplementary file

### Systematic Review Protocol

|                              |                                                                                                                                                                        |
|------------------------------|------------------------------------------------------------------------------------------------------------------------------------------------------------------------|
| <b>Title of the review</b>   | Efficacy and safety of nitazoxanide in treating SARS-CoV-2 infection: A systematic review and meta-analysis of blinded, placebo-controlled, randomized clinical trials |
| <b>Authors</b>               | Paulo Ricardo Martins-Filho, Edmundo Marques do Nascimento-Júnior, José Antônio Barreto-Alves, Ricardo Fakhouri, Lis Campos Ferreira                                   |
| <b>Supervisor/Project PI</b> | Paulo Ricardo Martins-Filho                                                                                                                                            |
| <b>Institution</b>           | Federal University of Sergipe                                                                                                                                          |

|                                                                                                                                                                                                                                                                                                                                                                                                                                                                                                                                                                                                                                                                                                                                                                                                                                                                                                                                                                                                                                                                                                                                                                                                                                     |                                                                                                                                                                                                                                                                                                                                                      |
|-------------------------------------------------------------------------------------------------------------------------------------------------------------------------------------------------------------------------------------------------------------------------------------------------------------------------------------------------------------------------------------------------------------------------------------------------------------------------------------------------------------------------------------------------------------------------------------------------------------------------------------------------------------------------------------------------------------------------------------------------------------------------------------------------------------------------------------------------------------------------------------------------------------------------------------------------------------------------------------------------------------------------------------------------------------------------------------------------------------------------------------------------------------------------------------------------------------------------------------|------------------------------------------------------------------------------------------------------------------------------------------------------------------------------------------------------------------------------------------------------------------------------------------------------------------------------------------------------|
| <b>1. Background</b>                                                                                                                                                                                                                                                                                                                                                                                                                                                                                                                                                                                                                                                                                                                                                                                                                                                                                                                                                                                                                                                                                                                                                                                                                |                                                                                                                                                                                                                                                                                                                                                      |
| <p>Severe acute respiratory syndrome coronavirus 2 (SARS-CoV-2) is a novel RNA virus associated with an acute pulmonary disease known as COVID-19. Given the lack of effective and safe antiviral agents against SARS-CoV-2, drug repurposing has played a critical role in the identification of rapidly available therapeutic solutions in treating patients with the disease (Heimfarth et al., 2020).</p> <p>After a comprehensive review published by Sanders and colleagues in April 2020 in the JAMA and a letter to the editor published by our research group in July 2020 in the American Journal of Physiology - Lung Cellular and Molecular Physiology calling attention to the potential antiviral effects of nitazoxanide and the need for high-quality trial evidence of this thiazolide antiparasitic drug in the treatment of SARS-CoV-2 infection, 28 interventional studies were registered on ClinicalTrials.gov, of which eight were completed or published at the time of writing this protocol.</p> <p><b>Aim</b></p> <p>This systematic review and meta-analysis aimed to synthesize the available evidence on the efficacy and safety of nitazoxanide as a treatment option in patients with COVID-19.</p> |                                                                                                                                                                                                                                                                                                                                                      |
| <b>2a. Criteria for including studies in the review based on PICOT elements</b>                                                                                                                                                                                                                                                                                                                                                                                                                                                                                                                                                                                                                                                                                                                                                                                                                                                                                                                                                                                                                                                                                                                                                     |                                                                                                                                                                                                                                                                                                                                                      |
| P (population)                                                                                                                                                                                                                                                                                                                                                                                                                                                                                                                                                                                                                                                                                                                                                                                                                                                                                                                                                                                                                                                                                                                                                                                                                      | Individuals with COVID-19                                                                                                                                                                                                                                                                                                                            |
| I (intervention)                                                                                                                                                                                                                                                                                                                                                                                                                                                                                                                                                                                                                                                                                                                                                                                                                                                                                                                                                                                                                                                                                                                                                                                                                    | Nitazoxanide                                                                                                                                                                                                                                                                                                                                         |
| C (comparison)                                                                                                                                                                                                                                                                                                                                                                                                                                                                                                                                                                                                                                                                                                                                                                                                                                                                                                                                                                                                                                                                                                                                                                                                                      | Placebo                                                                                                                                                                                                                                                                                                                                              |
| O (outcomes)                                                                                                                                                                                                                                                                                                                                                                                                                                                                                                                                                                                                                                                                                                                                                                                                                                                                                                                                                                                                                                                                                                                                                                                                                        | Primary: death<br>Secondary: viral load, positive RT-PCR status, composite measure of disease progression (ICU admission or invasive mechanical ventilation), serum biomarkers of inflammation (white blood cells, neutrophils, lymphocytes, C-reactive protein, D-dimer, lactate dehydrogenase, IL-6, IL-8, TNF- $\alpha$ ), and any adverse events |
| T (study type)                                                                                                                                                                                                                                                                                                                                                                                                                                                                                                                                                                                                                                                                                                                                                                                                                                                                                                                                                                                                                                                                                                                                                                                                                      | Blinded, placebo-controlled, RCTs                                                                                                                                                                                                                                                                                                                    |
| <b>2b. Criteria for excluding studies in the review</b>                                                                                                                                                                                                                                                                                                                                                                                                                                                                                                                                                                                                                                                                                                                                                                                                                                                                                                                                                                                                                                                                                                                                                                             |                                                                                                                                                                                                                                                                                                                                                      |
| Overlapping populations, open-label trials, observational studies, and trials testing drug associations                                                                                                                                                                                                                                                                                                                                                                                                                                                                                                                                                                                                                                                                                                                                                                                                                                                                                                                                                                                                                                                                                                                             |                                                                                                                                                                                                                                                                                                                                                      |
| <b>3. Search methods</b>                                                                                                                                                                                                                                                                                                                                                                                                                                                                                                                                                                                                                                                                                                                                                                                                                                                                                                                                                                                                                                                                                                                                                                                                            |                                                                                                                                                                                                                                                                                                                                                      |
| Electronic databases                                                                                                                                                                                                                                                                                                                                                                                                                                                                                                                                                                                                                                                                                                                                                                                                                                                                                                                                                                                                                                                                                                                                                                                                                | PubMed, Web of Science, Scopus, Embase                                                                                                                                                                                                                                                                                                               |
| Preprint servers                                                                                                                                                                                                                                                                                                                                                                                                                                                                                                                                                                                                                                                                                                                                                                                                                                                                                                                                                                                                                                                                                                                                                                                                                    | medRxiv                                                                                                                                                                                                                                                                                                                                              |
| Registries                                                                                                                                                                                                                                                                                                                                                                                                                                                                                                                                                                                                                                                                                                                                                                                                                                                                                                                                                                                                                                                                                                                                                                                                                          | ClinicalTrials.gov                                                                                                                                                                                                                                                                                                                                   |
| Other methods used for identifying relevant research                                                                                                                                                                                                                                                                                                                                                                                                                                                                                                                                                                                                                                                                                                                                                                                                                                                                                                                                                                                                                                                                                                                                                                                | Google Scholar (100 first results)<br>Reference lists of all eligible studies and reviews                                                                                                                                                                                                                                                            |
| Search strategy                                                                                                                                                                                                                                                                                                                                                                                                                                                                                                                                                                                                                                                                                                                                                                                                                                                                                                                                                                                                                                                                                                                                                                                                                     | (nitazoxanide) AND (COVID-19 OR “2019-nCoV Infection” OR “Coronavirus Disease-19” OR “2019-nCoV Disease” OR SARS-CoV-2)                                                                                                                                                                                                                              |
| Language restriction                                                                                                                                                                                                                                                                                                                                                                                                                                                                                                                                                                                                                                                                                                                                                                                                                                                                                                                                                                                                                                                                                                                                                                                                                | No                                                                                                                                                                                                                                                                                                                                                   |
| Filters                                                                                                                                                                                                                                                                                                                                                                                                                                                                                                                                                                                                                                                                                                                                                                                                                                                                                                                                                                                                                                                                                                                                                                                                                             | No                                                                                                                                                                                                                                                                                                                                                   |
| Search date                                                                                                                                                                                                                                                                                                                                                                                                                                                                                                                                                                                                                                                                                                                                                                                                                                                                                                                                                                                                                                                                                                                                                                                                                         | From January 1, 2020 to May 23, 2022                                                                                                                                                                                                                                                                                                                 |

| <b>4. Methods of review</b>                                                                                     |                                                                                                                                                                                                                                                                                                                                                                                                                                                                                                                                                         |
|-----------------------------------------------------------------------------------------------------------------|---------------------------------------------------------------------------------------------------------------------------------------------------------------------------------------------------------------------------------------------------------------------------------------------------------------------------------------------------------------------------------------------------------------------------------------------------------------------------------------------------------------------------------------------------------|
| Study selection                                                                                                 | Two reviewers will be screening titles and abstracts independently of each other. Disagreements should be resolved by consensus<br>1 <sup>st</sup> step: Initial screening of titles and abstracts<br>2 <sup>nd</sup> step: Full reading of potential papers for inclusion                                                                                                                                                                                                                                                                              |
| Risk of bias assessment                                                                                         | Cochrane guideline for RCTs: selection bias, performance bias, detection bias, attrition bias, reporting bias, and other biases. Include as “other biases”: sample size calculation, power analysis, and early stopping for futility (operational bias), outcome measurements (information bias), and the authors' financial or non-financial conflicts of interest that could appear to affect the judgment of research team when designing, conducting, or reporting study                                                                            |
| Data extraction                                                                                                 | Two main reviewers. The reviewers must add information to a standardized data extraction worksheet in Excel. The following information must be extracted: registry of the study protocol, demographic characteristics of study participants, pre-existing medical conditions, treatment arms, nitazoxanide protocol, concomitant medications, follow-up duration, and outcome data. For dichotomous outcomes: the number of events and individuals in each treatment group. For continuous outcomes: means and standard deviations for each study group |
| <b>5. Meta-analysis</b>                                                                                         |                                                                                                                                                                                                                                                                                                                                                                                                                                                                                                                                                         |
| Data synthesis                                                                                                  | Dichotomous variables: relative risk<br>Continuous variables: standardized mean difference<br>* Viral load: change from baseline                                                                                                                                                                                                                                                                                                                                                                                                                        |
| Statistical heterogeneity                                                                                       | I <sup>2</sup>                                                                                                                                                                                                                                                                                                                                                                                                                                                                                                                                          |
| Method                                                                                                          | Random or fixed-effects model. In the case of heterogeneity, the random-effects model will be used                                                                                                                                                                                                                                                                                                                                                                                                                                                      |
| Additional analyses                                                                                             | Funnel plot: if the number of studies > 10; Subgroup analysis: not planned; Sensitivity analysis: “leave one out” method                                                                                                                                                                                                                                                                                                                                                                                                                                |
| Results presentation                                                                                            | Forest plot                                                                                                                                                                                                                                                                                                                                                                                                                                                                                                                                             |
| Software                                                                                                        | Review Manager, version 5.3 (Cochrane IMS)                                                                                                                                                                                                                                                                                                                                                                                                                                                                                                              |
| <b>6. Strength of evidence</b>                                                                                  |                                                                                                                                                                                                                                                                                                                                                                                                                                                                                                                                                         |
| GRADE system ( <a href="https://www.gradepro.org/">https://www.gradepro.org/</a> )                              |                                                                                                                                                                                                                                                                                                                                                                                                                                                                                                                                                         |
| <i>Factors that can reduce the quality of the evidence</i>                                                      |                                                                                                                                                                                                                                                                                                                                                                                                                                                                                                                                                         |
| Risk of bias across studies                                                                                     | ↓ 1 or 2 levels                                                                                                                                                                                                                                                                                                                                                                                                                                                                                                                                         |
| Inconsistency of results                                                                                        | ↓ 1 or 2 levels                                                                                                                                                                                                                                                                                                                                                                                                                                                                                                                                         |
| Indirectness of evidence                                                                                        | ↓ 1 or 2 levels                                                                                                                                                                                                                                                                                                                                                                                                                                                                                                                                         |
| Imprecision                                                                                                     | ↓ 1 or 2 levels                                                                                                                                                                                                                                                                                                                                                                                                                                                                                                                                         |
| Influence of small trials (< 100 patients)                                                                      | ↓ 1 or 2 levels                                                                                                                                                                                                                                                                                                                                                                                                                                                                                                                                         |
| <i>Factors that can increase the quality of the evidence</i>                                                    |                                                                                                                                                                                                                                                                                                                                                                                                                                                                                                                                                         |
| Large magnitude of effect                                                                                       | ↑ 1 or 2 levels                                                                                                                                                                                                                                                                                                                                                                                                                                                                                                                                         |
| All plausible confounding would reduce the demonstrated effect or increase the effect if no effect was observed | ↑ 1 level                                                                                                                                                                                                                                                                                                                                                                                                                                                                                                                                               |
| Dose-response gradient                                                                                          | ↑ 1 level                                                                                                                                                                                                                                                                                                                                                                                                                                                                                                                                               |

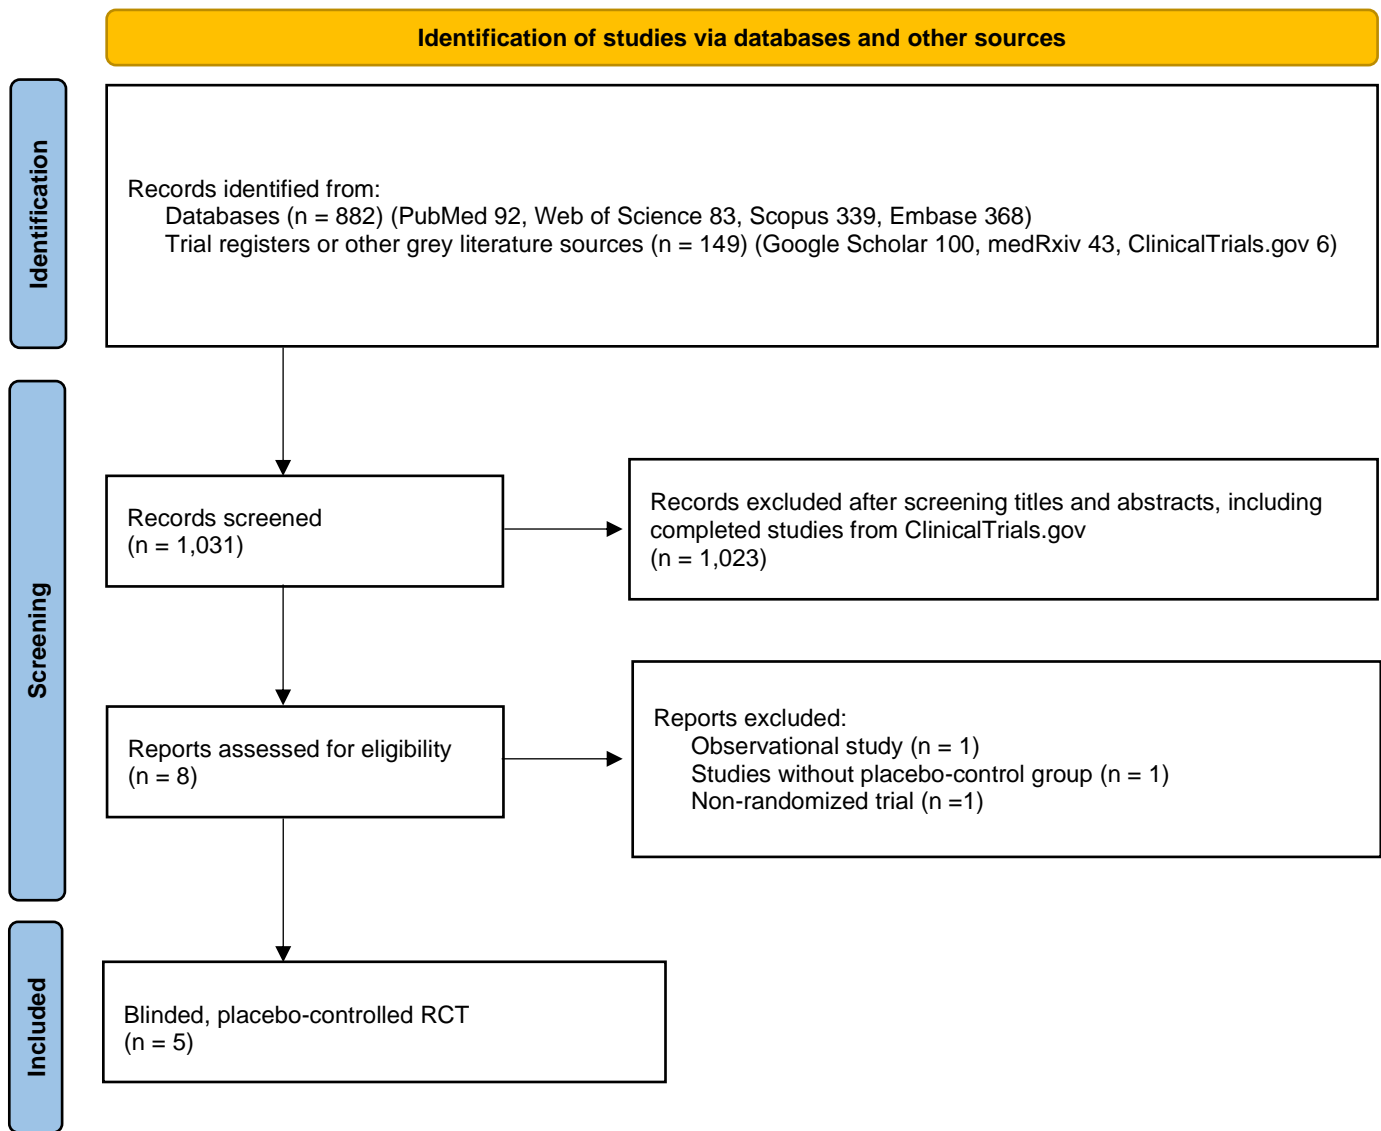

**eFig. 1. PRISMA flow chart of studies screened and included.**

|                | Random sequence generation (selection bias) | Allocation concealment (selection bias) | Blinding of participants and personnel (performance bias) | Blinding of outcome assessment (detection bias) | Incomplete outcome data (attrition bias) | Selective reporting (reporting bias) | Sample size calculation, power analysis, and early stop for futility (operational bias) | Outcome measurements (information bias) | Conflict of interest |
|----------------|---------------------------------------------|-----------------------------------------|-----------------------------------------------------------|-------------------------------------------------|------------------------------------------|--------------------------------------|-----------------------------------------------------------------------------------------|-----------------------------------------|----------------------|
| Blum 2021      | ?                                           | ?                                       | +                                                         | +                                               | +                                        | +                                    | -                                                                                       | +                                       | ?                    |
| Rocco 2021     | +                                           | +                                       | +                                                         | +                                               | +                                        | +                                    | +                                                                                       | +                                       | ?                    |
| Rocco 2022     | +                                           | +                                       | +                                                         | +                                               | +                                        | +                                    | +                                                                                       | +                                       | ?                    |
| Rossignol 2022 | +                                           | +                                       | +                                                         | +                                               | +                                        | -                                    | +                                                                                       | +                                       | ?                    |
| Silva 2021     | +                                           | ?                                       | +                                                         | -                                               | -                                        | -                                    | -                                                                                       | +                                       | ?                    |

eFig. 2. Risk of bias assessment.

**eTable 1. Strength of evidence for efficacy and safety of nitazoxanide in treating patients with COVID-19.**

| <b>Outcomes</b>                                 | <b>Risk of bias</b> | <b>Inconsistency</b> | <b>Indirectness</b> | <b>Imprecision</b> | <b>Influence of small trials</b> | <b>Large effect</b> | <b>Quality of evidence</b> |
|-------------------------------------------------|---------------------|----------------------|---------------------|--------------------|----------------------------------|---------------------|----------------------------|
| <b>Viral load</b>                               | Not serious         | Serious              | Not serious         | Not serious        | No                               | No                  | ⊕⊕⊕○                       |
| <b>Positive RT-PCR status</b>                   | Not serious         | Not serious          | Not serious         | Not serious        | No                               | No                  | ⊕⊕⊕⊕                       |
| <b>Composite measure of disease progression</b> | Not serious         | Not serious          | Not serious         | Serious            | No                               | No                  | ⊕⊕⊕○                       |
| <b>Death</b>                                    | Not serious         | Not serious          | Not serious         | Serious            | No                               | No                  | ⊕⊕⊕○                       |
| <b>Serum inflammatory biomarkers</b>            |                     |                      |                     |                    |                                  |                     |                            |
| <b>WBC</b>                                      | Not serious         | Not serious          | Serious             | Not serious        | No                               | No                  | ⊕⊕⊕○                       |
| <b>Neutrophils</b>                              | Not serious         | Not serious          | Serious             | Serious            | No                               | No                  | ⊕⊕○○                       |
| <b>Lymphocytes</b>                              | Not serious         | Not serious          | Serious             | Not serious        | No                               | No                  | ⊕⊕⊕○                       |
| <b>LDH</b>                                      | Not serious         | NA                   | Serious             | Not serious        | NA                               | No                  | -                          |
| <b>IL-6</b>                                     | Not serious         | Serious              | Serious             | Serious            | Yes                              | No                  | ⊕○○○                       |
| <b>IL-8</b>                                     | Not serious         | Serious              | Serious             | Serious            | Yes                              | No                  | ⊕○○○                       |
| <b>TNF-<math>\alpha</math></b>                  | Not serious         | NA                   | Serious             | Not serious        | NA                               | No                  | -                          |
| <b>CRP</b>                                      | Not serious         | Serious              | Serious             | Serious            | No                               | No                  | ⊕○○○                       |
| <b>D-dimer</b>                                  | Not serious         | Not serious          | Serious             | Not serious        | No                               | No                  | ⊕⊕⊕○                       |
| <b>Any adverse events</b>                       | Not serious         | Not serious          | Serious             | Not serious        | No                               | No                  | ⊕⊕⊕○                       |

WBC, white blood cells. LDH, lactate dehydrogenase. CRP, C-reactive protein. NA, not applicable.

Certainty: ⊕ very-low; ⊕⊕ low; ⊕⊕⊕ moderate; ⊕⊕⊕⊕ high.
